# Supplementary material for: Breeding Value of Primary Synthetic Wheat Genotypes for Grain Yield
Source: PubMed Central journal article supplement (PMC5033409; doi:10.1371/journal.pone.0162860), 2016-09-22
Supplement: pone.0162860.s001.pdf [file pone.0162860.s001.pdf]

**S1 Table. List of cultivated wheat and synthetic hexaploid lines used to develop the SDL populations.**

| GID     | Bread Wheat parents         |
|---------|-----------------------------|
| 5653842 | MILAN/S87230//BAV92         |
| 6763520 | 3570                        |
| 6763547 | CACUKE                      |
| 6763623 | KRL19                       |
| 6763636 | KIRITATI                    |
| 6763790 | PANDORA                     |
| 6763911 | KIRITATI/2*TRCH             |
| 6763917 | SW89.5181/KAUZ              |
| 6764000 | SUNCO/2*PASTOR              |
| 6764117 | PBW502                      |
| 6764191 | MILAN/AMSEL                 |
| 6764276 | TAM200/TUI                  |
| 6764815 | MINO                        |
| 6764954 | MUU                         |
| 6765077 | HS420                       |
| 6765130 | KIRITATI//PRL/2*PASTOR      |
| 4747309 | GONDO                       |
| 4885783 | GONDO//SHA5/WEAVER/3/PASTOR |
| 4248    | CNO79                       |
|         | OCI                         |

**S1 Table (continue). List of cultivated wheat and synthetic hexaploid lines used to develop the SDL populations.**

| GID     | SYNP NO. | Synthetic parents                                     |
|---------|----------|-------------------------------------------------------|
| 5989409 | SYNP1    | 68.111/RGB-U//WARD RESEL/3/STIL/4/AE.SQUARROSA (1119) |
| 5989410 | SYNP2    | 68.111/RGB-U//WARD RESEL/3/STIL/4/AE.SQUARROSA (1164) |
| 5989411 | SYNP3    | 68.111/RGB-U//WARD RESEL/3/STIL/4/AE.SQUARROSA (1166) |
| 5989414 | SYNP4    | 68.111/RGB-U//WARD RESEL/3/STIL/4/AE.SQUARROSA (1219) |
| 180150  | SYNP5    | 68.111/RGB-U//WARD/3/AE.SQUARROSA (325)               |
| 5989418 | SYNP6    | 68.111/RGB-U//WARD/3/FGO/4/RABI/5/AE.SQUARROSA (1110) |
| 227752  | SYNP7    | 6973/WARD.7463//74110/3/AE.SQUARROSA (438)            |
| 5989403 | SYNP9    | ALTAR 84/AE.SQUARROSA (895)                           |
| 192513  | SYNP11   | CETA/AE.SQUARROSA (263)                               |
| 227787  | SYNP12   | CETA/AE.SQUARROSA (1055)                              |
| 5989458 | SYNP13   | CETA/AE.SQUARROSA (1187)                              |
| 5989460 | SYNP14   | CETA/AE.SQUARROSA (1219)                              |
| 192496  | SYNP15   | CETA/AE.SQUARROSA (184)                               |
| 5989431 | SYNP16   | CETA/AE.SQUARROSA (224)                               |
| 5989440 | SYNP17   | CETA/AE.SQUARROSA (372)                               |
| 5989446 | SYNP18   | CETA/AE.SQUARROSA (518)                               |
| 5989450 | SYNP19   | CETA/AE.SQUARROSA (895)                               |
| 5989390 | SYNP20   | CROC_1/AE.SQUARROSA (372)                             |

|         |        |                                            |
|---------|--------|--------------------------------------------|
| 5989393 | SYNP21 | CROC_1/AE.SQUARROSA (895)                  |
| 174363  | SYNP22 | DOY1/AE.SQUARROSA (1027)                   |
| 174317  | SYNP23 | DOY1/AE.SQUARROSA (334)                    |
| 2447504 | SYNP24 | DOY1/AE.SQUARROSA (443)                    |
| 180022  | SYNP25 | DVERD_2/AE.SQUARROSA (247)                 |
| 172285  | SYNP26 | GAN/AE.SQUARROSA (446)                     |
| 2447515 | SYNP27 | GAN/AE.SQUARROSA (536)                     |
| 3562369 | SYNP28 | GARZA/BOY//AE.SQUARROSA (228)              |
| 5989495 | SYNP31 | LOCAL RED/AE.SQUARROSA (518)               |
| 5989487 | SYNP34 | RASCON_37/AE.SQUARROSA (205)               |
| 4061131 | SYNP35 | SHAG_22/AE.SQUARROSA (1084)                |
| 227726  | SYNP36 | SHAG_22/AE.SQUARROSA (239)                 |
| 5989505 | SYNP39 | SOMAT_4/INTER_8//AE.SQUARROSA (1206)       |
| 172922  | SYNP43 | YUK/AE.SQUARROSA (864)                     |
| 4254403 | SYNP44 | MAYOOR//TK SN1081/AE.SQUARROSA (222)/3/OCI |
