# Supplementary material for: Breeding Value of Primary Synthetic Wheat Genotypes for Grain Yield
Source: PubMed Central journal article supplement (PMC5033409; doi:10.1371/journal.pone.0162860), 2016-09-22
Supplement: pone.0162860.s002.pdf [file pone.0162860.s002.pdf]

**S2 Table. TKW and GFD for BW parents, BP, BC and TC populations in IRRI.Y11.12.**

| Populations | Cross <sup>1</sup> | BW <sup>2</sup> parents | SYN <sup>3</sup> parents | Mean GFD <sup>4</sup> (days) | Range GFD (days) | BWP GFD (days) | Increase/decrease GFD (%) | Mean TKW <sup>5</sup> (gr) | Range TKW (gr) | BWP TKW (gr) | Increase/decrease TKW (%) |
|-------------|--------------------|-------------------------|--------------------------|------------------------------|------------------|----------------|---------------------------|----------------------------|----------------|--------------|---------------------------|
| 68          | BP                 | CACUKE                  | SYNP16                   | 56                           | 54-59            | 57             | -1.8                      | 52                         | 41-61          | 54           | -3.70                     |
| 60          | BP                 | CACUKE                  | SYNP5                    | 58.5                         | 57-60            | 57             | 2.6                       | 57.8                       | 51-63          | 54           | 7.04                      |
| 78          | BP                 | KIRITATI                | SYNP24                   | 55                           | 55-55            | 52             | 5.8                       | 49                         | 49-49          | 50           | -2.00                     |
| 71          | BP                 | KRL19                   | SYNP18                   | 54.5                         | 54-55            | 56             | -2.7                      | 44                         | 44-44          | 41           | 7.32                      |
| 86          | BP                 | KRL19                   | SYNP36                   | 58                           | 58-58            | 56             | 3.6                       | 51                         | 51-51          | 41           | 24.39                     |
| 70          | BP                 | MILAN/S87230//BAV92     | SYNP17                   | 53.5                         | 53-54            | 52             | 2.9                       | 46.5                       | 46-47          | 43           | 8.14                      |
| 75          | BP                 | MILAN/S87230//BAV92     | SYNP20                   | 52.9                         | 49-56            | 52             | 1.7                       | 52                         | 44-59          | 43           | 20.93                     |
| 77          | BP                 | MILAN/S87230//BAV92     | SYNP21                   | 54.8                         | 52-57            | 52             | 5.4                       | 51.5                       | 46-57          | 43           | 19.77                     |
| 83          | BP                 | MILAN/S87230//BAV92     | SYNP27                   | 51                           | 49-54            | 52             | -1.9                      | 48                         | 44-51          | 43           | 11.63                     |
| 88          | BP                 | MILAN/S87230//BAV92     | SYNP39                   | 53.3                         | 50-57            | 52             | 2.5                       | 50.8                       | 43-60          | 43           | 18.14                     |
| 58          | BP                 | MILAN/S87230//BAV92     | SYNP4                    | 56                           | 54-57            | 52             | 7.7                       | 51                         | 49-54          | 43           | 18.60                     |
| 84          | BP                 | MUU                     | SYNP34                   | 55.5                         | 50-60            | 51             | 8.8                       | 53                         | 42-62          | 47           | 12.77                     |
| 67          | BP                 | PANDORA                 | SYNP14                   | 56.2                         | 55-60            | 55             | 2.2                       | 50.6                       | 45-60          | 45           | 12.44                     |
| 72          | BP                 | PANDORA                 | SYNP18                   | 55.8                         | 52-59            | 55             | 1.5                       | 46.6                       | 46-48          | 45           | 3.56                      |
| 73          | BP                 | PANDORA                 | SYNP19                   | 55.6                         | 53-58            | 55             | 1.1                       | 50.8                       | 48-55          | 45           | 12.89                     |
| 53          | BP                 | PANDORA                 | SYNP1                    | 53.3                         | 50-56            | 55             | -3.1                      | 45.3                       | 44-46          | 45           | 0.67                      |
| 76          | BP                 | PANDORA                 | SYNP21                   | 57.3                         | 56-61            | 55             | 4.2                       | 55.5                       | 50-64          | 45           | 23.33                     |
| 54          | BP                 | PANDORA                 | SYNP2                    | 57                           | 54-60            | 55             | 3.6                       | 43.5                       | 43-44          | 45           | -3.33                     |
| 89          | BP                 | PANDORA                 | SYNP39                   | 54.1                         | 50-56            | 55             | -1.6                      | 48                         | 45-51          | 45           | 6.67                      |
| 56          | BP                 | PANDORA                 | SYNP3                    | 58                           | 58-58            | 55             | 5.5                       | 51                         | 51-51          | 45           | 13.33                     |
| 80          | BP                 | PBW502                  | SYNP25                   | 61                           | 61-61            | 52             | 17.3                      | 58                         | 58-58          | 51           | 13.73                     |
| 90          | BP                 | PBW502                  | SYNP43                   | 58                           | 58-58            | 52             | 11.5                      | 52                         | 52-52          | 51           | 1.96                      |
| 61          | BP                 | PBW502                  | SYNP5                    | 58                           | 56-60            | 52             | 11.5                      | 49                         | 49-49          | 51           | -3.92                     |
| 82          | BP                 | SUNCO/2*PASTOR          | SYNP27                   | 53.4                         | 51-56            | 53             | 0.8                       | 46                         | 42-50          | 41           | 12.20                     |
| 62          | BP                 | SUNCO/2*PASTOR          | SYNP5                    | 56.7                         | 56-57            | 53             | 7.0                       | 47                         | 43-49          | 41           | 14.63                     |
| 63          | BP                 | SW89.5181/KAUZ          | SYNP6                    | 50.3                         | 49-52            | 49             | 2.7                       | 46                         | 43-48          | 43           | 6.98                      |

<sup>1</sup>: Cross; BP: Bi-parental, BC: Back-cross, TC: Three-way cross, <sup>2</sup>: BW: Bread wheat, <sup>3</sup>: SYN; Synthetic, <sup>4</sup>: GFD; Grain filling duration, <sup>5</sup>: TKW; Thousand kernel weight.

**S2 Table. (Continue) TKW and GFD for BW parents, BP, BC and TC populations in IRRI.Y11.12.**

| Populations | Cross | BW parents             | SYN parents | Mean GFD (days) | Range GFD (days) | BWP GFD (days) | Increase/decrease GFD (%) | Mean TKW (gr) | Range TKW (gr) | BWP TKW (gr) | Increase/decrease TKW (%) |
|-------------|-------|------------------------|-------------|-----------------|------------------|----------------|---------------------------|---------------|----------------|--------------|---------------------------|
| 22          | BC    | CACUKE                 | SYNP16      | 57              | 55-59            | 57             | 0.0                       | 55.8          | 50-61          | 54           | 3.33                      |
| 35          | BC    | CACUKE                 | SYNP25      | 56.9            | 55-58            | 57             | -0.2                      | 56.6          | 51-62          | 54           | 4.81                      |
| 48          | BC    | CACUKE                 | SYNP43      | 57.7            | 55-60            | 57             | 1.2                       | 56.9          | 51-64          | 54           | 5.37                      |
| 9           | BC    | CACUKE                 | SYNP5       | 57.5            | 56-59            | 57             | 0.9                       | 57            | 51-65          | 54           | 5.56                      |
| 16          | BC    | KIRITATI               | SYNP11      | 51.7            | 49-53            | 52             | -0.6                      | 47.3          | 44-49          | 50           | -5.40                     |
| 34          | BC    | KIRITATI               | SYNP24      | 53.5            | 51-55            | 52             | 2.9                       | 52.2          | 47-57          | 50           | 4.40                      |
| 37          | BC    | KIRITATI               | SYNP26      | 52.7            | 50-55            | 52             | 1.3                       | 48.5          | 45-53          | 50           | -3.00                     |
| 10          | BC    | KIRITATI               | SYNP5       | 55.2            | 53-58            | 52             | 6.2                       | 47.3          | 41-56          | 50           | -5.40                     |
| 94          | TC    | KIRITATI//PRL/2*PASTOR | SYNP44      | 52.1            | 51-54            | 52             | 0.2                       | 44.5          | 40-53          | 54           | -17.59                    |
| 92          | TC    | KRL19                  | SYNP15      | 55              | 51-59            | 56             | -1.8                      | 43.8          | 42-46          | 41           | 6.83                      |
| 25          | BC    | KRL19                  | SYNP18      | 57.1            | 55-59            | 56             | 2.0                       | 45.6          | 42-51          | 41           | 11.22                     |
| 45          | BC    | KRL19                  | SYNP36      | 56.9            | 53-60            | 56             | 1.6                       | 45.9          | 43-54          | 41           | 11.95                     |
| 91          | TC    | MILAN/AMSEL            | SYNP7       | 53.9            | 49-57            | 52             | 3.7                       | 48.6          | 43-55          | 44           | 10.45                     |
| 24          | BC    | MILAN/S87230//BAV92    | SYNP17      | 51.5            | 48-54            | 52             | -1.0                      | 46.7          | 42-56          | 43           | 8.60                      |
| 29          | BC    | MILAN/S87230//BAV92    | SYNP20      | 52.6            | 50-56            | 52             | 1.2                       | 47.2          | 41-57          | 43           | 9.77                      |
| 31          | BC    | MILAN/S87230//BAV92    | SYNP21      | 53.4            | 50-56            | 52             | 2.7                       | 48.8          | 41-57          | 43           | 13.49                     |
| 33          | BC    | MILAN/S87230//BAV92    | SYNP23      | 53.3            | 50-56            | 52             | 2.5                       | 46.7          | 42-53          | 43           | 8.60                      |
| 40          | BC    | MILAN/S87230//BAV92    | SYNP27      | 53              | 49-57            | 52             | 1.9                       | 47.2          | 43-55          | 43           | 9.77                      |
| 47          | BC    | MILAN/S87230//BAV92    | SYNP39      | 52.9            | 48-56            | 52             | 1.7                       | 46.3          | 40-52          | 43           | 7.67                      |
| 7           | BC    | MILAN/S87230//BAV92    | SYNP4       | 53.8            | 51-57            | 52             | 3.5                       | 47.5          | 42-57          | 43           | 10.47                     |
| 96          | TC    | MINO                   | SYNP36      | 55.8            | 54-59            | 54             | 3.3                       | 46.2          | 41-57          | 41           | 12.68                     |
| 43          | BC    | MUU                    | SYNP34      | 52.4            | 51-54            | 51             | 2.7                       | 46            | 41-49          | 47           | -2.13                     |
| 17          | BC    | PANDORA                | SYNP11      | 55.2            | 54-57            | 55             | 0.4                       | 44.8          | 41-51          | 45           | -0.44                     |
| 21          | BC    | PANDORA                | SYNP14      | 56.1            | 52-60            | 55             | 2.0                       | 49.1          | 42-53          | 45           | 9.11                      |
| 26          | BC    | PANDORA                | SYNP18      | 54.3            | 53-56            | 55             | -1.3                      | 46.6          | 42-51          | 45           | 3.56                      |
| 27          | BC    | PANDORA                | SYNP19      | 56.2            | 55-57            | 55             | 2.2                       | 48.2          | 42-54          | 45           | 7.11                      |
| 2           | BC    | PANDORA                | SYNP1       | 54.3            | 51-57            | 55             | -1.3                      | 46.9          | 42-52          | 45           | 4.22                      |
| 30          | BC    | PANDORA                | SYNP21      | 55.6            | 54-58            | 55             | 1.1                       | 51.7          | 47-59          | 45           | 14.89                     |

**S2 Table. (Continue) TKW and GFD for BW parents, BP, BC and TC populations in IRRI.Y11.12.**

| Populations | Cross | BW parents     | SYN parents | Mean GFD (days) | Range GFD (days) | BWP GFD (days) | Increase/decrease GFD (%) | Mean TKW (gr) | Range TKW (gr) | BWP TKW (gr) | Increase/decrease TKW (%) |
|-------------|-------|----------------|-------------|-----------------|------------------|----------------|---------------------------|---------------|----------------|--------------|---------------------------|
| 32          | BC    | PANDORA        | SYNP23      | 55              | 53-57            | 55             | 0.0                       | 47.7          | 42-51          | 45           | 6.00                      |
| 38          | BC    | PANDORA        | SYNP26      | 55.9            | 52-58            | 55             | 1.6                       | 48            | 41-53          | 45           | 6.67                      |
| 3           | BC    | PANDORA        | SYNP2       | 56              | 56-56            | 55             | 1.8                       | 44.7          | 42-49          | 45           | -0.67                     |
| 42          | BC    | PANDORA        | SYNP31      | 55              | 53-56            | 55             | 0.0                       | 50.3          | 44-57          | 45           | 11.78                     |
| 46          | BC    | PANDORA        | SYNP39      | 55.2            | 53-58            | 55             | 0.4                       | 45.8          | 40-53          | 45           | 1.78                      |
| 5           | BC    | PANDORA        | SYNP3       | 56.2            | 54-58            | 55             | 2.2                       | 51.4          | 47-59          | 45           | 14.22                     |
| 36          | BC    | PBW502         | SYNP25      | 59.3            | 58-61            | 52             | 14.0                      | 54.5          | 49-60          | 51           | 6.86                      |
| 49          | BC    | PBW502         | SYNP43      | 59.5            | 57-62            | 52             | 14.4                      | 55.8          | 51-61          | 51           | 9.41                      |
| 11          | BC    | PBW502         | SYNP5       | 58.9            | 57-61            | 52             | 13.3                      | 51.7          | 45-65          | 51           | 1.37                      |
| 39          | BC    | SUNCO/2*PASTOR | SYNP27      | 53.7            | 51-58            | 53             | 1.3                       | 47.2          | 43-54          | 41           | 15.12                     |
| 50          | BC    | SUNCO/2*PASTOR | SYNP43      | 55.3            | 52-59            | 53             | 4.3                       | 47.6          | 43-57          | 41           | 16.10                     |
| 12          | BC    | SUNCO/2*PASTOR | SYNP5       | 56.2            | 52-61            | 53             | 6.0                       | 45.9          | 41-50          | 41           | 11.95                     |
| 44          | BC    | SW89.5181/KAUZ | SYNP35      | 52.3            | 49-57            | 49             | 6.7                       | 46.5          | 40-56          | 43           | 8.14                      |
| 14          | BC    | SW89.5181/KAUZ | SYNP6       | 51.4            | 48-57            | 49             | 4.9                       | 44.6          | 41-52          | 43           | 3.72                      |
