# Supplementary material for: Breeding Value of Primary Synthetic Wheat Genotypes for Grain Yield
Source: PubMed Central journal article supplement (PMC5033409; doi:10.1371/journal.pone.0162860), 2016-09-22
Supplement: pone.0162860.s003.pdf [file pone.0162860.s003.pdf]

**S3 Table. GEBVs of cultivated wheat for measured traits in three contrasting environments.**

| Trait                           | YLD    |        |        | PLH     |        |        | DHE    |        |        | DFL    |        |        | DMA    |        |        |
|---------------------------------|--------|--------|--------|---------|--------|--------|--------|--------|--------|--------|--------|--------|--------|--------|--------|
| Environments<br>BWP             | IRRI.  | DRO.   | HEAT   | IRRI.   | DRO.   | HEAT   | IRRI.  | DRO.   | HEAT   | IRRI.  | DRO.   | HEAT   | IRRI.  | DRO.   | HEAT   |
| CNO79                           | 0.482  | 0.116  | 0.100  | -11.843 | -4.774 | -2.542 | 3.611  | 2.553  | 0.603  | 3.035  | 2.364  | 1.170  | 1.953  | 1.579  | 0.464  |
| GONDO                           | 0.162  | -0.147 | 0.210  | -3.638  | -2.789 | 0.089  | 4.521  | 3.279  | 0.623  | 6.201  | 2.921  | 2.782  | 3.572  | 3.296  | 0.447  |
| GONDO//SHA5/WE<br>AVER/3/PASTOR | 0.394  | 0.097  | 0.030  | -7.832  | -4.536 | -3.451 | 0.908  | 1.733  | 0.197  | 1.989  | 1.563  | 0.130  | 1.462  | 0.543  | -0.220 |
| MILAN/S87230//BA<br>V92         | 1.400  | 0.435  | 0.647  | -1.926  | -2.664 | -0.163 | 3.529  | 1.008  | 0.363  | 2.735  | 0.851  | 1.622  | 0.284  | 0.316  | 0.161  |
| BW Line 3570                    | 1.344  | 0.416  | 0.643  | -1.720  | -2.542 | -0.139 | 3.663  | 1.084  | 0.502  | 2.849  | 0.828  | 1.725  | 0.370  | 0.369  | 0.296  |
| CACUKE                          | 0.427  | 0.132  | 0.147  | 1.276   | 3.656  | 2.295  | -4.237 | -0.941 | -2.050 | -2.984 | -0.261 | -2.903 | -2.160 | -0.182 | -1.263 |
| KRL19                           | 0.458  | 0.212  | 0.251  | -10.248 | -4.009 | -1.304 | -3.341 | -0.624 | -1.504 | -2.901 | -0.480 | -1.980 | -2.091 | -1.258 | -1.335 |
| KIRITATI                        | 0.824  | 0.226  | 0.422  | -1.556  | -0.152 | 1.740  | 5.033  | 1.967  | 1.469  | 3.302  | 0.842  | 2.324  | 1.570  | 0.718  | 0.913  |
| PANDORA                         | 0.741  | 0.078  | -0.011 | -8.458  | -4.549 | -4.306 | 2.716  | 3.731  | 1.720  | 3.024  | 3.171  | 1.585  | 2.523  | 2.376  | 0.786  |
| KIRITATI/2*TRCH                 | -0.067 | 0.283  | 0.282  | -12.240 | -4.633 | -5.656 | -7.833 | -3.893 | 0.234  | -5.538 | -2.449 | -1.693 | -3.046 | -4.821 | -0.377 |
| SW89.5181/KAUZ                  | 0.906  | -0.128 | 0.003  | -4.146  | -5.945 | -4.030 | 9.883  | 5.608  | 5.047  | 7.713  | 4.233  | 5.046  | 4.279  | 2.906  | 2.951  |
| SUNCO/2*PASTOR                  | -0.160 | 0.117  | 0.110  | 0.548   | -2.816 | -1.917 | 3.014  | 1.122  | 2.357  | 1.712  | 1.175  | 1.101  | 1.242  | -0.166 | 2.444  |
| PBW502                          | 0.633  | 0.146  | 0.650  | -0.536  | -2.916 | 5.560  | 4.328  | 2.078  | 0.476  | 3.775  | 2.154  | 2.656  | 1.624  | 1.320  | 0.356  |
| MILAN/AMSEL                     | 0.165  | -0.111 | -0.033 | -3.063  | -3.320 | -1.316 | 6.567  | 3.358  | 0.109  | 5.312  | 3.162  | 0.790  | 3.155  | 2.453  | -0.111 |
| TAM200/TUI                      | 0.466  | 0.007  | 0.253  | -5.665  | -3.619 | -1.351 | -0.400 | 0.858  | 1.567  | 0.453  | 0.996  | 1.901  | 0.213  | -0.361 | 0.684  |
| MINO                            | 0.475  | 0.263  | 0.242  | -2.680  | 1.615  | 2.446  | 1.243  | 3.810  | -2.333 | 0.948  | 2.427  | -1.272 | 0.366  | 1.131  | -1.438 |
| MUU                             | -0.021 | 0.026  | -0.326 | 1.560   | -2.548 | -1.257 | 5.019  | 1.901  | 2.385  | 2.780  | 1.119  | 2.974  | 1.108  | 0.598  | 1.077  |
| HS420                           | 0.848  | 0.098  | 0.244  | -3.405  | -4.523 | -2.199 | 0.246  | 0.702  | -0.506 | 2.680  | 1.772  | -0.802 | 2.496  | 3.019  | -0.625 |
| KIRITATI/PRL/2*P<br>ASTOR       | 0.764  | 0.205  | 0.342  | -2.483  | -0.469 | 1.247  | 4.457  | 1.861  | 1.475  | 2.905  | 0.793  | 2.357  | 1.681  | 0.809  | 0.928  |
