# Supplementary material for: Breeding Value of Primary Synthetic Wheat Genotypes for Grain Yield
Source: PubMed Central journal article supplement (PMC5033409; doi:10.1371/journal.pone.0162860), 2016-09-22
Supplement: pone.0162860.s004.pdf [file pone.0162860.s004.pdf]

**S4 Table. GEBVs of SYN lines for measured traits in three contrasting environments.**

| Trait<br>Environments<br>SYN parent NO. | YLD   |       |       | PLH   |       |       | DHE   |       |       | DFL   |       |       | DMA   |       |       |
|-----------------------------------------|-------|-------|-------|-------|-------|-------|-------|-------|-------|-------|-------|-------|-------|-------|-------|
|                                         | IRRI. | DRO.  | HEAT  | IRRI. | DRO.  | HEAT  | IRRI. | DRO.  | HEAT  | IRRI. | DRO.  | HEAT  | IRRI. | DRO.  | HEAT  |
| SYNP1                                   | -2.46 | -0.55 | -1.74 | 19.84 | 9.69  | 3.42  | 1.30  | -1.80 | 0.62  | -0.41 | -2.23 | -1.98 | -0.13 | -1.28 | 0.51  |
| SYNP2                                   | -2.28 | -0.64 | -1.06 | 15.65 | 8.28  | 4.83  | 0.07  | -3.68 | 0.25  | -1.86 | -3.39 | -1.30 | -0.81 | -1.52 | 0.54  |
| SYNP3                                   | -2.07 | -0.35 | -0.85 | 20.51 | 11.91 | 5.49  | -1.20 | -3.14 | -0.34 | -0.39 | -3.32 | -2.41 | 0.65  | -0.88 | 0.07  |
| SYNP4                                   | -1.69 | -0.34 | -0.58 | 17.92 | 10.20 | 3.95  | -2.13 | -2.91 | -0.26 | -1.03 | -2.96 | -2.51 | 1.51  | -0.13 | 0.32  |
| SYNP5                                   | -0.25 | -0.15 | -0.39 | 1.76  | 4.31  | -0.55 | -8.04 | -5.06 | -2.99 | -5.49 | -4.07 | -3.83 | -0.85 | -1.68 | -1.67 |
| SYNP6                                   | -2.46 | -0.52 | -0.81 | 16.20 | 8.58  | 3.30  | 0.22  | -2.68 | 1.21  | -1.85 | -2.42 | 0.50  | -3.50 | -2.95 | 1.33  |
| SYNP7                                   | -0.73 | -0.24 | -0.09 | 1.20  | 2.94  | 0.54  | -4.92 | -3.19 | -2.68 | -1.46 | -1.27 | -1.71 | 0.95  | 1.08  | -1.52 |
| SYNP9                                   | -1.60 | -0.42 | -0.39 | 12.40 | 5.30  | 3.49  | -1.01 | -1.07 | -0.43 | 0.57  | -0.81 | -2.41 | 2.62  | 1.21  | 0.18  |
| SYNP11                                  | -1.45 | -0.66 | -0.81 | 5.66  | 2.54  | 2.40  | -0.31 | -1.62 | -0.24 | -1.79 | -1.51 | -1.32 | -1.18 | -0.57 | -0.01 |
| SYNP12                                  | -1.21 | -0.31 | 0.26  | 7.04  | 3.06  | 1.84  | -6.08 | -6.08 | -4.19 | -5.00 | -2.67 | -1.28 | -1.71 | -1.15 | -1.94 |
| SYNP13                                  | -0.94 | -0.32 | -0.10 | 12.05 | 6.73  | 3.32  | -5.23 | -3.97 | -2.44 | -2.30 | -3.35 | -3.41 | 0.64  | -1.23 | -1.42 |
| SYNP14                                  | -1.55 | -0.34 | -0.02 | 20.46 | 10.44 | 5.63  | -4.16 | -3.41 | -3.07 | -1.76 | -3.37 | -2.86 | -0.34 | -0.25 | -0.88 |
| SYNP15                                  | -0.49 | -0.26 | -0.05 | 13.25 | 4.69  | 3.01  | -1.86 | -0.70 | -3.07 | -0.24 | -0.06 | -1.35 | 0.43  | 1.35  | -1.06 |
| SYNP16                                  | -2.05 | -0.52 | -0.71 | 10.09 | 4.41  | 5.31  | -1.16 | -1.44 | -2.18 | -1.59 | -2.24 | -2.36 | -0.22 | -0.90 | -0.58 |
| SYNP17                                  | -1.88 | -0.76 | -1.01 | 20.10 | 7.80  | 4.60  | -0.67 | -1.61 | -2.03 | -2.19 | -2.19 | -1.48 | -1.12 | -0.09 | 0.37  |
| SYNP18                                  | -2.38 | -0.67 | -0.69 | 17.85 | 7.45  | 5.42  | -0.42 | -3.93 | -1.10 | -0.92 | -3.16 | -1.53 | -1.98 | -1.77 | -0.21 |
| SYNP19                                  | -1.54 | -0.44 | -0.28 | 16.28 | 8.18  | 5.84  | -0.88 | -2.41 | -1.77 | -0.82 | -2.36 | -2.51 | 0.61  | 0.04  | -0.24 |
| SYNP20                                  | -1.89 | -1.02 | -1.15 | 8.20  | 1.52  | 2.84  | 0.54  | -0.22 | -0.04 | 2.37  | 0.14  | -0.66 | 2.24  | 1.87  | 1.12  |
| SYNP21                                  | -1.62 | -0.60 | -0.41 | 5.82  | 3.69  | 4.53  | -1.44 | -1.02 | -0.57 | 2.11  | -0.56 | -2.21 | 3.04  | 1.45  | 0.30  |
| SYNP22                                  | -1.00 | -0.33 | -0.16 | 9.98  | 4.11  | 3.00  | -4.30 | -3.62 | -2.67 | -3.13 | -2.99 | -2.56 | 0.00  | -2.01 | -1.68 |
| SYNP23                                  | -1.39 | -0.44 | -0.54 | 3.43  | 1.68  | 2.61  | -1.54 | -1.84 | -1.61 | -0.51 | -1.48 | -2.04 | 0.70  | -0.27 | -0.76 |
| SYNP24                                  | -1.19 | -0.38 | -0.25 | 12.80 | 6.77  | 3.74  | -4.46 | -3.92 | -2.13 | -2.93 | -3.41 | -2.85 | -0.61 | -1.86 | -1.25 |
| SYNP25                                  | -1.80 | -0.36 | -0.22 | 13.12 | 10.70 | 4.48  | -6.90 | -6.48 | -4.31 | -2.97 | -4.64 | -3.57 | -1.81 | -3.46 | -2.50 |
| SYNP26                                  | -0.44 | -0.10 | 0.09  | 6.44  | 4.30  | 1.37  | -4.92 | -4.62 | -2.47 | -4.24 | -2.75 | -2.82 | 0.67  | -1.17 | -1.19 |
| SYNP27                                  | -1.24 | -0.14 | 0.14  | 0.58  | 2.82  | 0.02  | -5.42 | -5.34 | -1.67 | -3.21 | -2.21 | 0.28  | -1.62 | -2.24 | -0.57 |
| SYNP28                                  | -2.69 | -0.63 | -0.72 | 7.54  | 6.55  | 1.67  | -3.91 | -5.75 | -1.14 | -1.69 | -3.41 | -1.96 | -1.15 | -2.54 | -0.55 |
| SYNP31                                  | -2.43 | -0.63 | -0.85 | 15.18 | 4.76  | 3.91  | -2.13 | -2.51 | 0.56  | -4.07 | -3.49 | -1.39 | -1.52 | -0.61 | 0.12  |
| SYNP34                                  | -2.02 | -0.51 | -0.99 | 6.43  | 2.37  | 5.11  | -1.14 | -0.67 | 0.12  | -0.29 | -0.68 | -1.20 | 1.16  | 1.17  | 0.72  |
| SYNP35                                  | -2.20 | -0.66 | -0.57 | 9.26  | 5.64  | 3.76  | -5.26 | -6.61 | -1.65 | -2.12 | -3.56 | -2.60 | -2.12 | -2.43 | -0.68 |
| SYNP36                                  | -1.21 | -0.32 | 0.24  | 7.94  | 3.35  | 1.47  | -5.92 | -5.99 | -4.07 | -4.60 | -2.66 | -1.30 | -1.29 | -1.16 | -1.82 |
| SYNP39                                  | -2.09 | -0.37 | -0.56 | 7.36  | 4.97  | 4.04  | -0.46 | -1.34 | -0.16 | 0.35  | -0.62 | -0.92 | -0.90 | -0.47 | 0.03  |
| SYNP43                                  | -1.06 | -0.28 | -0.17 | 9.96  | 4.72  | 4.12  | -4.97 | -3.60 | -0.25 | -5.26 | -3.54 | -1.12 | 0.12  | -1.72 | 0.09  |
| SYNP44                                  | -0.29 | -0.10 | -0.16 | -6.53 | -3.21 | -0.70 | 1.55  | 1.48  | 0.06  | 1.99  | 1.72  | 0.14  | 1.79  | 1.26  | -0.14 |
