# Supplementary material for: Breeding Value of Primary Synthetic Wheat Genotypes for Grain Yield
Source: PubMed Central journal article supplement (PMC5033409; doi:10.1371/journal.pone.0162860), 2016-09-22
Supplement: pone.0162860.s005.pdf [file pone.0162860.s005.pdf]

| <b>S5 Table. GEBVs of BW parents and the top 10% of the SDLs within the population under heat stress.</b> |                                          |       |                 |                          |
|-----------------------------------------------------------------------------------------------------------|------------------------------------------|-------|-----------------|--------------------------|
| BW Parents                                                                                                | SYN Parents                              | Cross | Ave. Yield GEBV | % increase/decrease GEBV |
| <b>3570</b>                                                                                               |                                          |       | <b>0.64</b>     |                          |
| 3570                                                                                                      | SYNP14                                   | BC    | 0.55            | -14                      |
| <b>CACUKE</b>                                                                                             |                                          |       | <b>0.15</b>     |                          |
| CACUKE                                                                                                    | SYNP5                                    | BC    | 0.46            | 215                      |
| CACUKE                                                                                                    | SYNP16                                   | BC    | 0.50            | 243                      |
| CACUKE                                                                                                    | SYNP43                                   | BC    | 0.62            | 322                      |
| <b>GONDO//<br/>SHA5/WEAVER/3/PASTOR</b>                                                                   |                                          |       | <b>0.03</b>     |                          |
| GONDO//<br>SHA5/WEAVER/3/PASTOR                                                                           | SYNP7                                    | BP    | 0.45            | 42                       |
| <b>HS420</b>                                                                                              |                                          |       | <b>0.24</b>     |                          |
| HS420                                                                                                     | SYNP13                                   | BC    | 0.59            | 142                      |
| <b>KIRITATI</b>                                                                                           |                                          |       | <b>0.42</b>     |                          |
| KIRITATI                                                                                                  | SYNP5                                    | BC    | 0.43            | 2                        |
| <b>KRL19</b>                                                                                              |                                          |       | <b>0.25</b>     |                          |
| KRL19                                                                                                     | SYNP18                                   | BC    | 0.49            | 95                       |
| KRL19                                                                                                     | SYNP36                                   | BC    | 0.42            | 67                       |
| <b>MILAN/S87230//BAV92</b>                                                                                |                                          |       | <b>0.65</b>     |                          |
| MILAN/S87230//BAV92                                                                                       | SYNP4                                    | BC    | 0.59            | -9                       |
| MILAN/S87230//BAV92                                                                                       | SYNP4                                    | BP    | 0.45            | -30                      |
| MILAN/S87230//BAV92                                                                                       | SYNP17                                   | BC    | 0.49            | -24                      |
| MILAN/S87230//BAV92                                                                                       | SYNP17                                   | BP    | 0.57            | -12                      |
| MILAN/S87230//BAV92                                                                                       | SYNP20                                   | BC    | 0.53            | -18                      |
| MILAN/S87230//BAV92                                                                                       | SYNP20                                   | BP    | 0.41            | -37                      |
| MILAN/S87230//BAV92                                                                                       | SYNP21                                   | BP    | 0.61            | -6                       |
| MILAN/S87230//BAV92                                                                                       | SYNP21                                   | BC    | 0.62            | -4                       |
| MILAN/S87230//BAV92                                                                                       | SYNP23                                   | BC    | 0.58            | -10                      |
| MILAN/S87230//BAV92                                                                                       | SYNP27                                   | BC    | 0.58            | -10                      |
| MILAN/S87230//BAV92                                                                                       | SYNP39                                   | BC    | 0.51            | -21                      |
| MILAN/S87230//BAV92                                                                                       | SYNP39                                   | BP    | 0.49            | -24                      |
| <b>MINO</b>                                                                                               |                                          |       | <b>0.24</b>     |                          |
| MINO                                                                                                      | SYNP36/4/GONDO//<br>SHA5/WEAVER/3/PASTOR | TC    | 0.50            | 108                      |
| <b>MUU</b>                                                                                                |                                          |       | <b>-0.33</b>    |                          |
| MUU                                                                                                       | SYNP34                                   | BP    | 0.55            | 69                       |
| <b>PANDORA</b>                                                                                            |                                          |       | <b>-0.01</b>    |                          |
| PANDORA                                                                                                   | SYNP1                                    | BC    | 0.64            | 63                       |
| PANDORA                                                                                                   | SYNP14                                   | BP    | 0.59            | 58                       |
| PANDORA                                                                                                   | SYNP19                                   | BP    | 0.43            | 42                       |
| PANDORA                                                                                                   | SYNP19                                   | BC    | 0.46            | 45                       |
| PANDORA                                                                                                   | SYNP21                                   | BP    | 0.53            | 52                       |
| PANDORA                                                                                                   | SYNP26                                   | BC    | 0.49            | 48                       |
| <b>PBW502</b>                                                                                             |                                          |       | <b>0.65</b>     |                          |
| PBW502                                                                                                    | SYNP22//KIRITATI                         | TC    | 0.48            | -26                      |
| PBW502                                                                                                    | SYNP5                                    | BC    | 0.42            | -35                      |
| PBW502                                                                                                    | SYNP25                                   | BC    | 0.52            | -20                      |
| <b>SUNCO/2*PASTOR</b>                                                                                     |                                          |       | <b>0.11</b>     |                          |
| SUNCO/2*PASTOR                                                                                            | SYNP27                                   | BC    | 0.58            | 427                      |
| SUNCO/2*PASTOR                                                                                            | SYNP5                                    | BC    | 0.47            | 327                      |
| SUNCO/2*PASTOR                                                                                            | SYNP43                                   | BC    | 0.49            | 345                      |
| <b>TAM200/TUI</b>                                                                                         |                                          |       | <b>0.25</b>     |                          |
| TAM200/TUI                                                                                                | SYNP2                                    | BC    | 0.48            | 92                       |
| TAM200/TUI                                                                                                | SYNP3                                    | BP    | 0.41            | 64                       |
| TAM200/TUI                                                                                                | SYNP4                                    | BC    | 0.42            | 68                       |
