# Supplementary material for: Breeding Value of Primary Synthetic Wheat Genotypes for Grain Yield
Source: PubMed Central journal article supplement (PMC5033409; doi:10.1371/journal.pone.0162860), 2016-09-22
Supplement: pone.0162860.s006.pdf [file pone.0162860.s006.pdf]

**S6 Table. GEBVs of BW parents and their SDLs in the top 10% of the population under irrigated conditions.**

| BW Parents                 | SYN Parents                              | Cross | Ave. Yield GEBVs | % increase/decrease GEBV |
|----------------------------|------------------------------------------|-------|------------------|--------------------------|
| <b>3570</b>                |                                          |       | <b>1.34</b>      |                          |
| 3570                       | SYNP14                                   | BC    | 0.98             | -27                      |
| <b>CACUKE</b>              |                                          |       | <b>0.43</b>      |                          |
| CACUKE                     | SYNP5                                    | BC    | 0.73             | 72                       |
| <b>HS420</b>               |                                          |       | <b>0.85</b>      |                          |
| HS420                      | SYNP13                                   | BC    | 0.78             | -8                       |
| <b>KIRITATI</b>            |                                          |       | <b>0.82</b>      |                          |
| KIRITATI                   | SYNP5                                    | BC    | 0.78             | -6                       |
| <b>MILAN/S87230//BAV92</b> |                                          |       | <b>1.40</b>      |                          |
| MILAN/S87230//BAV92        | SYNP4                                    | BC    | 0.92             | -34                      |
| MILAN/S87230//BAV92        | SYNP4                                    | BP    | 0.78             | -44                      |
| MILAN/S87230//BAV92        | SYNP20                                   | BC    | 0.94             | -33                      |
| MILAN/S87230//BAV92        | SYNP20                                   | BP    | 0.89             | -37                      |
| MILAN/S87230//BAV92        | SYNP21                                   | BC    | 0.90             | -36                      |
| MILAN/S87230//BAV92        | SYNP21                                   | BP    | 0.83             | -41                      |
| MILAN/S87230//BAV92        | SYNP21                                   | BP    | 0.86             | -38                      |
| MILAN/S87230//BAV92        | SYNP23                                   | BC    | 1.02             | -27                      |
| MILAN/S87230//BAV92        | SYNP27                                   | BC    | 1.05             | -25                      |
| MILAN/S87230//BAV92        | SYNP27                                   | BP    | 0.78             | -45                      |
| MILAN/S87230//BAV92        | SYNP27                                   | BP    | 0.72             | -49                      |
| MILAN/S87230//BAV92        | SYNP39                                   | BC    | 0.86             | -38                      |
| <b>MINO</b>                |                                          |       | <b>0.48</b>      |                          |
| MINO                       | SYNP36/4/GONDO//<br>SHA5/WEAVER/3/PASTOR | TC    | 0.84             | 77                       |
| <b>MUU</b>                 |                                          |       | <b>-0.02</b>     |                          |
| MUU                        | SYNP34                                   | BP    | 0.76             | 78                       |
| <b>PANDORA</b>             |                                          |       | <b>0.74</b>      |                          |
| PANDORA                    | SYNP3                                    | BC    | 1.00             | 35                       |
| PANDORA                    | SYNP11                                   | BC    | 0.72             | -2                       |
| PANDORA                    | SYNP14                                   | BC    | 0.80             | 8                        |
| PANDORA                    | SYNP18                                   | BP    | 0.83             | 12                       |
| PANDORA                    | SYNP19                                   | BC    | 0.96             | 29                       |
| PANDORA                    | SYNP23                                   | BC    | 0.71             | -4                       |
| PANDORA                    | SYNP26                                   | BC    | 0.82             | 11                       |
| PANDORA                    | SYNP39                                   | BC    | 0.69             | -7                       |
| <b>SUNCO/2*PASTOR</b>      |                                          |       | <b>-0.16</b>     |                          |
| SUNCO/2*PASTOR             | SYNP5                                    | BC    | 0.95             | 111                      |
| SUNCO/2*PASTOR             | SYNP5                                    | BP    | 0.71             | 87                       |
| SUNCO/2*PASTOR             | SYNP27                                   | BC    | 0.80             | 96                       |
| SUNCO/2*PASTOR             | SYNP43                                   | BC    | 0.90             | 106                      |
| <b>SW89.5181/KAUZ</b>      |                                          |       | <b>0.91</b>      |                          |
| SW89.5181/KAUZ             | SYNP6                                    | BC    | 1.09             | 20                       |
| SW89.5181/KAUZ             | SYNP35                                   | BC    | 0.76             | -17                      |
| <b>TAM200/TUI</b>          |                                          |       | <b>0.47</b>      |                          |
| TAM200/TUI                 | SYNP2                                    | BC    | 0.78             | 67                       |
| TAM200/TUI                 | SYNP3                                    | BC    | 0.80             | 71                       |
